# Supplementary material for: Establishing the Phenolic Composition of Olea europaea L. Leaves from Cultivars Grown in Morocco as a Crucial Step Towards Their Subsequent Exploitation
Source: MDPI journal article supplement (doi:10.3390/molecules23102524), 2018-10-02
Supplement: s1 [file s1]

### Supplementary Materials

**Table 1S.** Analytical parameters of the developed LC-MS method, including calibration curves equations and  $r^2$ , LOD and LOQ, linear ranges and repeatability (expressed as % RSD).

| Compound             | Rt<br>(min) | Calibration curves     | $r^2$  | LOD<br>( $\mu\text{g/L}$ ) | LOQ<br>( $\mu\text{g/L}$ ) | Linear range <sup>a</sup><br>(mg/L) | Repeatability <sup>b</sup>      |                                 |
|----------------------|-------------|------------------------|--------|----------------------------|----------------------------|-------------------------------------|---------------------------------|---------------------------------|
|                      |             |                        |        |                            |                            |                                     | RSD <sub>intra-day</sub><br>(%) | RSD <sub>inter-day</sub><br>(%) |
| Hydroxytyrosol       | 7.3         | $y = 29083x + 7653.4$  | 0.9985 | 14                         | 45                         | 60                                  | 2.1                             | 5.6                             |
| Tyrosol              | 9.4         | $y = 11972x - 1367.2$  | 0.9999 | 42                         | 141                        | 70                                  | 5.1                             | 7.1                             |
| Vanillic acid        | 10.8        | $y = 13497x - 636.8$   | 0.9984 | 36                         | 120                        | 5                                   | 4.3                             | 5.5                             |
| Rutin                | 13.2        | $y = 3420x - 902.06$   | 0.9957 | 97                         | 325                        | 12.5                                | 4.4                             | 9.4                             |
| Luteolin-7-glucoside | 13.9        | $y = 9917x + 6620.8$   | 0.9951 | 41                         | 136                        | 12.5                                | 7.5                             | 8.6                             |
| Apigenin-7-glucoside | 15.5        | $y = 19166x + 15207$   | 0.9918 | 15                         | 51                         | 12.5                                | 5.8                             | 6.7                             |
| Oleuropein           | 16.7        | $y = 8630.3x + 509.45$ | 0.9981 | 40                         | 132                        | 12.5                                | 3.8                             | 3.9                             |
| Luteolin             | 19.8        | $y = 127143x + 7126.3$ | 0.9984 | 5                          | 18                         | 12.5                                | 3.4                             | 3.8                             |
| Pinoresinol          | 20.5        | $y = 48060x - 5210.3$  | 0.9996 | 16                         | 53                         | 12.5                                | 5.1                             | 5.7                             |
| Apigenin             | 22.3        | $y = 190558x - 6919.3$ | 0.9971 | 3                          | 11                         | 12.5                                | 1.8                             | 2.1                             |

<sup>a</sup>Linear ranges were established from LOQ to the indicated value.

<sup>b</sup>Repeatability is expressed as % RSD of peak area for 4 injections of 4 different extracts of the QC carried out within the same sequence (*intra-day*) or over 4 days (*inter-day*).
